# Supplementary material for: Human beta-defensin 3 contributes to the carcinogenesis of cervical cancer via activation of NF-κB signaling
Source: PubMed Central journal article supplement (PMC5342786; doi:10.18632/oncotarget.12426), 2016-10-04
Supplement: oncotarget-07-75902-s001.pdf [file oncotarget-07-75902-s001.pdf]

## Human beta-defensin 3 contributes to the carcinogenesis of cervical cancer via activation of NF- $\kappa$ B signaling

### SUPPLEMENTARY FIGURES AND TABLE

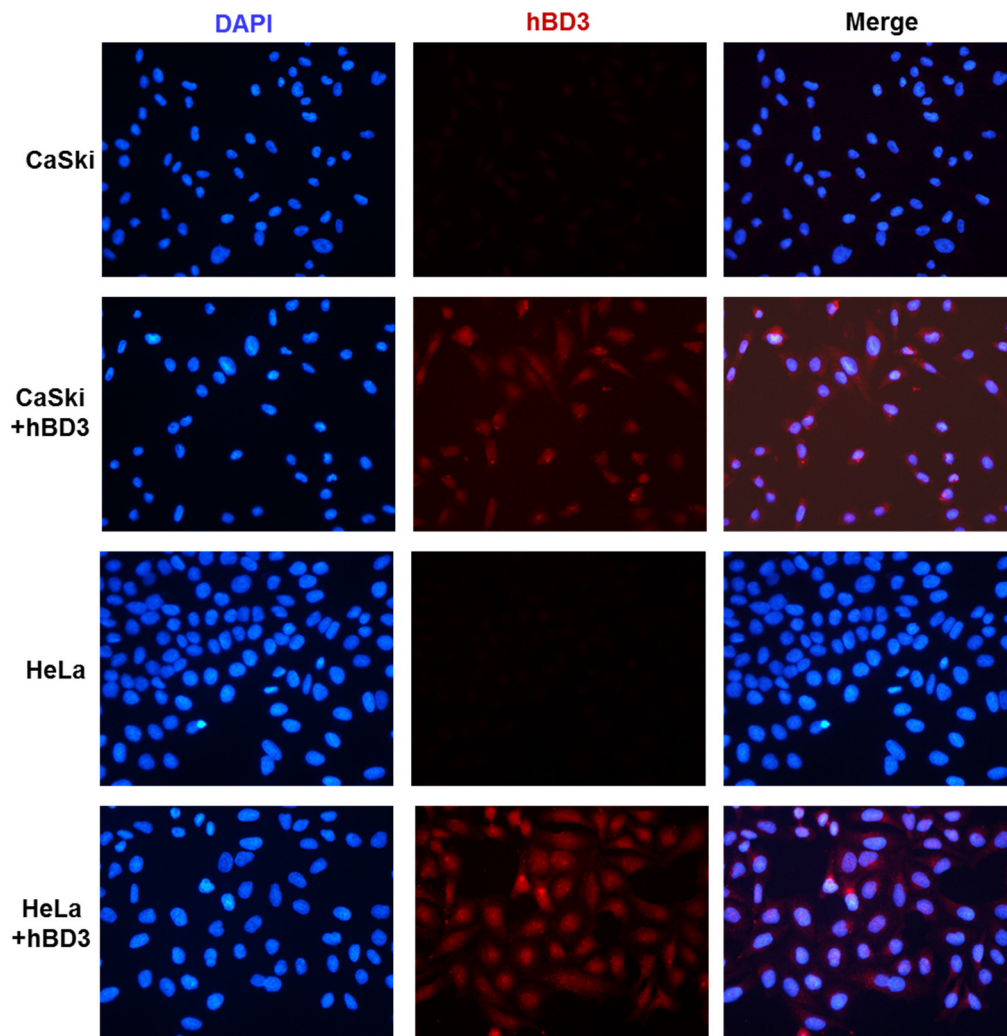

Supplementary Figure S1: Immunofluorescence analysis of hBD3 expression of parental and hBD3-overexpressing HeLa and CaSki cells.

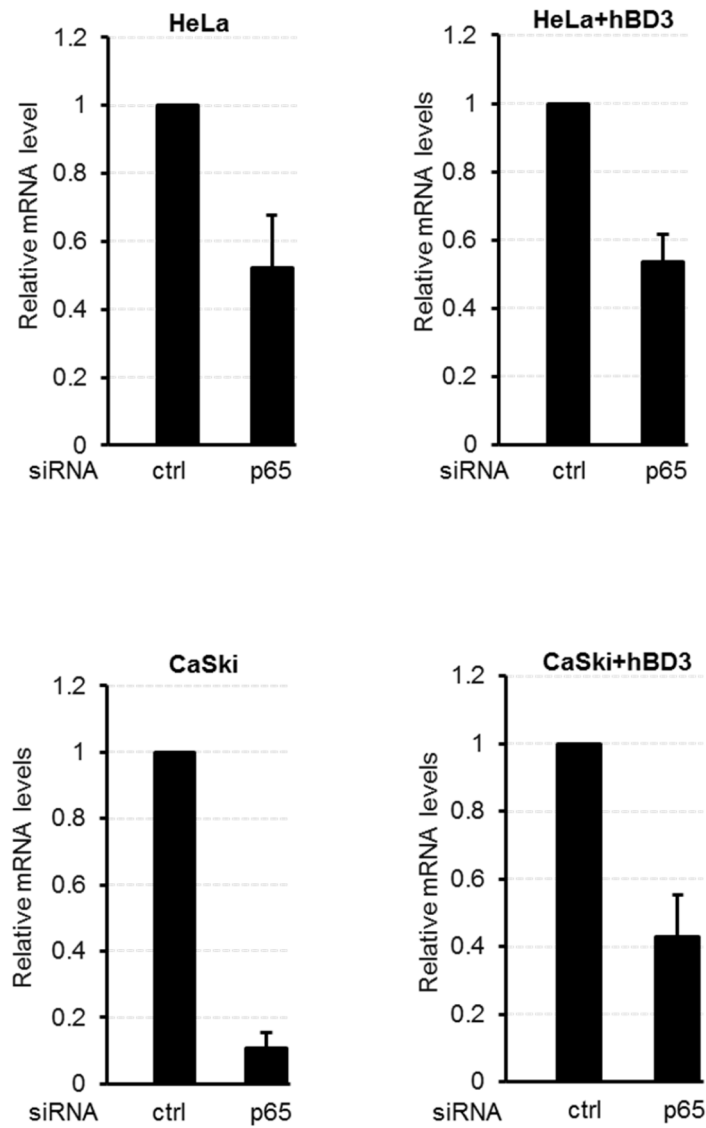

Supplementary Figure S2: The efficiency of p65 knockdown in parental and hBD3-overexpressing HeLa and CaSki cells.

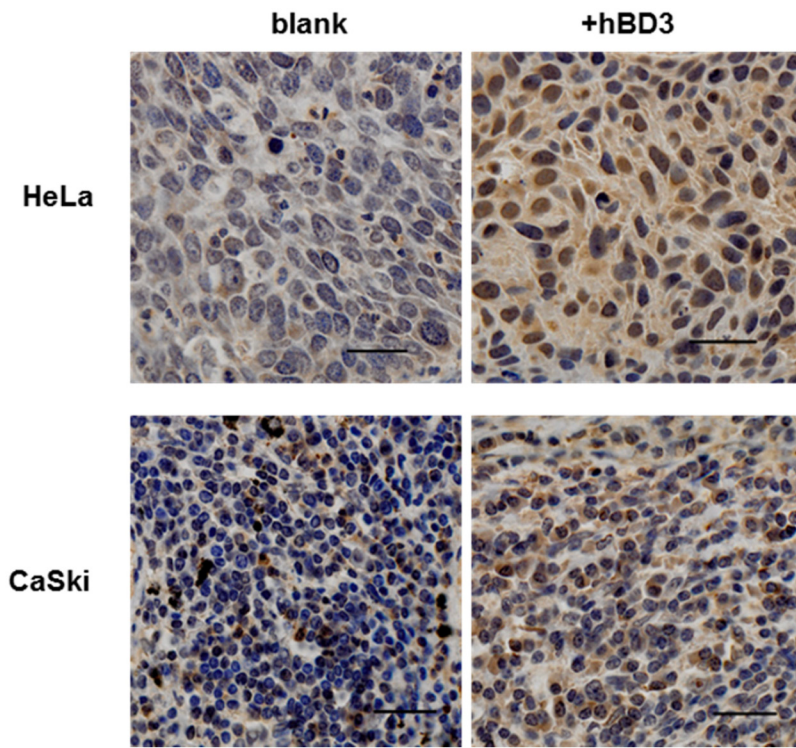

Supplementary Figure S3: The immunohistochemical analysis of phosph-p65 in the xenografts, scale bar=25 $\mu$ m.

**Supplementary Table S1: The RT-PCR primers and sequences of siRNAs used in this study**

| Name      | Target             | Sequence                                                                      |
|-----------|--------------------|-------------------------------------------------------------------------------|
| nc siRNA  | Negative control   | Forward : 5'-UUCUCCGAACGUGUCACGUTT-3'<br>Reverse: 5'-ACGUGACACGUUCGGAGAATT-3' |
| p65 siRNA | NF- $\kappa$ B p65 | Forward: 5'-CCUCCUUUCAGGAGAUGAATT-3'<br>Reverse: 5'- UUCAUCUCCUGAAAGGAGGTT-3' |
| hBD3      | RT-PCR             | Forward: 5'-TGCTCTTCCTGTTTTTGGTGC-3'<br>Reverse: 5'-TGCCGATCTGTTCCCTCCTTT-3'  |
| p65       | RT-PCR             | Forward: 5'-GGGAAGGAACGCTGTCAGAG-3'<br>Reverse: 5'- TAGCCTCAGGGTACTCCATCA-3'  |
